# Supplementary material for: Sulfur Nanoparticle-Decorated Nickel Cobalt Sulfide Hetero-Nanostructures with Enhanced Energy Storage for High-Performance Supercapacitors
Source: MDPI journal article supplement (doi:10.3390/molecules27217458), 2022-11-02
Supplement: s1 [file s1]

## **Supplementary Materials**

# **Sulfur nanoparticle-decorated nickel cobalt sulfide hetero-nanostructures with enhanced energy storage for high-performance supercapacitors**

**Yedluri Anil Kumar<sup>a,#</sup>, Anuja A. Yadav<sup>b,#</sup>, Bandar Ali Al-Asbahi<sup>c</sup>, Seok-Won Kang<sup>b</sup>, Md Moniruzzaman<sup>d,\*</sup>**

<sup>a</sup> Department of Physics, United Arab Emirates University, Al Ain 15551, United Arab Emirates

<sup>b</sup> Department of Automotive Engineering, Yeungnam University, 280 Daehak-ro, Gyeongsan, Gyeongbuk 38541, Republic of Korea.

<sup>c</sup> Department of Physics & Astronomy, College of Science, King Saud University, P.O.Box 2455, Riyadh 11451, Saudi Arabia.

<sup>d</sup> Department of Chemical and Biological Engineering, Gachon University, 1342 Seongnam-daero, Seongnam-si, Gyeonggi-do 13120, Republic of Korea.

**# Equal author contribution**

**\*Corresponding Author**

**E-mail:** [mani57chem@gachon.ac.kr](mailto:mani57chem@gachon.ac.kr)

Tel: +82 10 3261 0692.

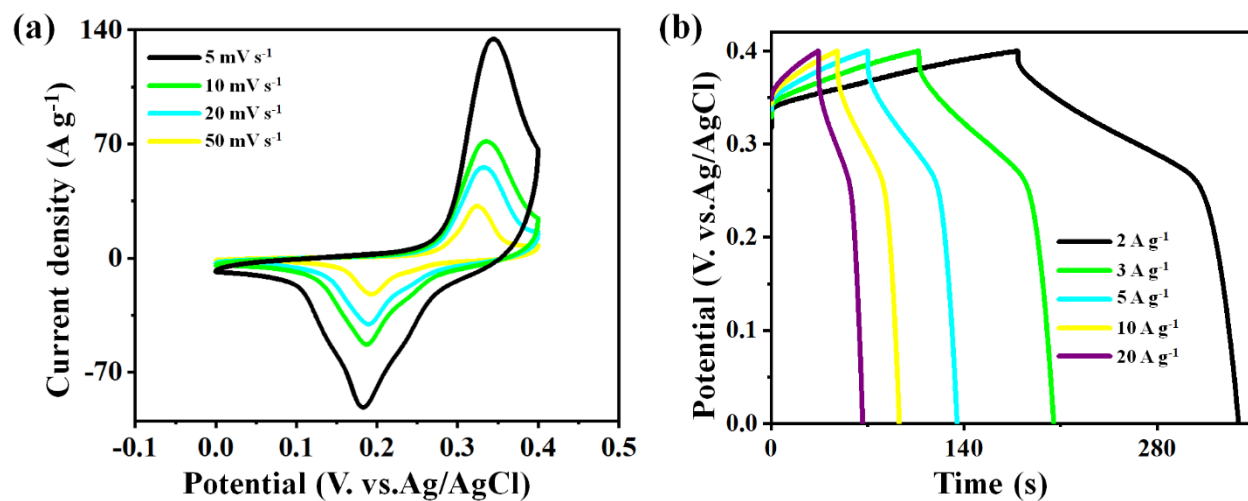

**Figure S1.** (a and b) CV and GCD plots of pure  $\text{NiCo}_2\text{S}_4$  nanoparticles electrode at various scan rates and current densities in aqueous electrolyte.

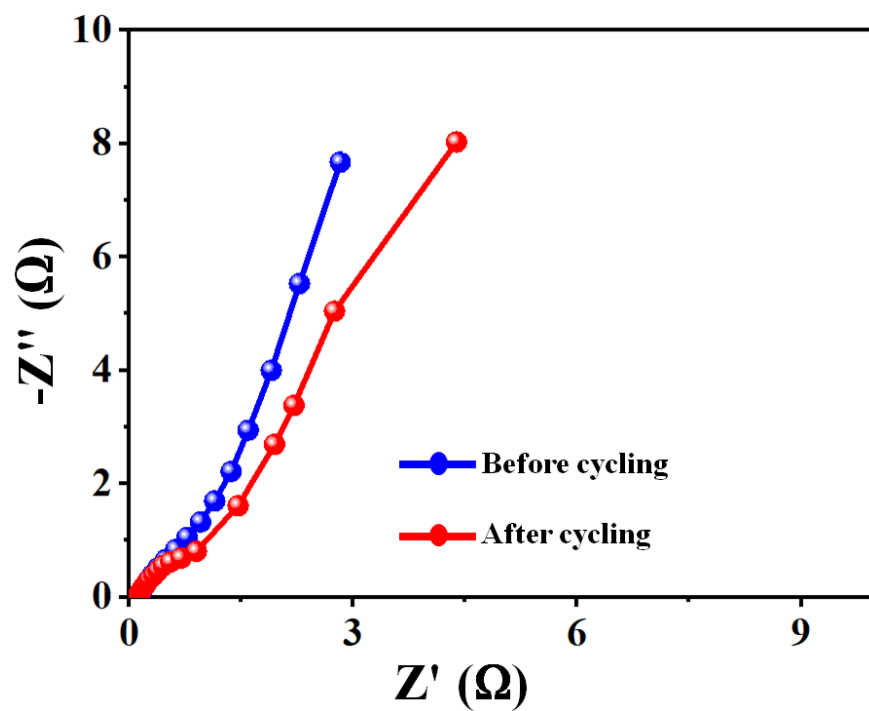

**Figure S2.** EIS curves of the sulfur deficient  $\text{NiCo}_2\text{S}_4$  before and after 3500 cycles of stability test at  $3 \text{ A g}^{-1}$ .
